# Supplementary material for: Retrospective Analysis of Leishmaniasis in Sicily (Italy) from 2013 to 2021: One-Health Impact and Future Control Strategies
Source: MDPI journal article supplement (doi:10.3390/microorganisms10091704), 2022-08-24
Supplement: s1 [file s1]

**Table S1.** Results distribution of molecular and serological analysis in humans, canines and felines population.

| Species | Clinical Presentation (number) | Clinical samples (number)   | IFAT <sup>1</sup> Positive/total | qPCR <sup>2</sup> Positive/total | Positive patients selection                                                         |
|---------|--------------------------------|-----------------------------|----------------------------------|----------------------------------|-------------------------------------------------------------------------------------|
| Humans  | VL <sup>3</sup> (135)          | Serum (341)                 | 100/341                          | n.a. <sup>4</sup>                | - 110 VL qPCR positive, IFAT positive;                                              |
|         |                                | Bone marrow (341)           | n.a.                             | 135/341                          | - 25 VL qPCR positive, IFAT negative;                                               |
|         | CL <sup>5</sup> (332)          | Tissue/skin biopsy (699)    | n.a.                             | 322/699                          | - 322 CL qPCR positive;                                                             |
| Canine  | CanL <sup>6</sup> (23794)      | Serum (74349)               | 23794/74349                      | n.a.                             | -22755 CanL qPCR positive, IFAT positive;                                           |
|         |                                | Popliteal lymphnode (74349) | n.a.                             | 23794/74349                      | - 1035 CanL IFAT positive, qPCR negative;<br>- 4 CanL qPCR positive, IFAT negative; |
| Feline  | FeL <sup>7</sup> (274)         | Serum (4774)                | 109/4774                         | n.a.                             | -109 FeL qPCR positive, IFAT positive;                                              |
|         |                                | Popliteal lymph node (4774) | n.a.                             | 274/4774                         | - 165 FeL qPCR positive, IFAT negative;                                             |

<sup>1</sup>IFAT, indirect immunofluorescent assay; <sup>2</sup>qPCR, quantitative PCR; <sup>3</sup>VL, visceral leishmaniasis; <sup>4</sup>n.a., not applicable; <sup>5</sup>CL, cutaneous leishmaniasis; <sup>6</sup>CanL, canine leishmaniasis; <sup>7</sup>FeL, feline leishmaniasis.
